# Supplementary material for: Anxiety-Like Behavioural Inhibition Is Normative under Environmental Threat-Reward Correlations
Source: PLOS journal article supplement (doi:10.1371/journal.pcbi.1004646), 2015-12-09
Supplement: S1 (10.1371/journal.pcbi.1004646.s001) [file journal.pcbi.1004646.s001]

## 1. Model

**Table S1:** Additional variables used in supplemental information (see table in main text for remaining variables)

|                                          |                                                                                                            |
|------------------------------------------|------------------------------------------------------------------------------------------------------------|
| $\tilde{\lambda}$                        | Time-varying event rate of an inhomogeneous Poisson process controlling the punisher activation            |
| $\lambda_3$                              | Scaling parameter of prior threat distribution                                                             |
| $g(t; k; \vartheta), G(u; l; \vartheta)$ | Pdf and cdf of a gamma distribution, describing the time-varying part of the inhomogeneous Poisson process |
| $C(t_1)$                                 | Biological cost of making a movement, in scenario 1 with metabolic cost                                    |

### 1.1. Example for scenario 2

We can model the threat events as inhomogeneous Poisson process with decaying event rate, after a pellet has appeared:

$$P_{x>0} = 1 - P(x = 0) = 1 - e^{-\mu(t_1, t_2)}$$

with

$$\mu(t_1, t_2) = \int_{t_1}^{t_2} \tilde{\lambda}(u) du.$$

A natural predator that is activated quickly by a reward and then decreases its attention may be modelled by the sum of a constant baseline event rate and the pdf of a Gamma distribution  $g(t; k; \vartheta)$  with cdf  $G(u; l; \vartheta)$ . For illustration, we choose a mode of the distribution at 0.4 s and a fixed relation of baseline rate and time-varying rate:

$$\tilde{\lambda}(t) = \lambda_3 (0.1 + 0.9g(t; 5; 0.1)).$$

$$\mu(t_1, t_2) = [0.1\lambda_3 u]_{t_1}^{t_2} + [0.9\lambda_3 G(u; 5; 0.1)]_{t_1}^{t_2}$$

$$= 0.1\lambda_3 \Delta t + 0.9\lambda_3 (G(t_2; 5; 0.1) - G(t_1; 5; 0.1)).$$

Both  $E(G)$  and  $E(L)$  explicitly depend on  $t_1$ , and for the given prior, the expected outcome is maximised for some  $t_1^* > 0$ . For the illustrations in Fig. 1/2 of the main text, the following assumptions were made:

The animal correctly learns the threat probability of scenario 1 over the interval  $[t_1, t_2]$ , but believes it is in scenario 2 and therefore assigns them to the wrong underlying process, i. e.  $\mu(t_1, t_2) = \lambda_2$ . Further, we assume that the animal in all trials moves at  $t_1 = 1$  s with  $\Delta t = 1$  s. Then we have

$$\mu(t_1, t_2) = 0.1\lambda_3 \Delta t + 0.9\lambda_3 (G(t_2; 5; 0.1) - G(t_1; 5; 0.1)) = \lambda_2 \Delta t.$$

From the above, it follows that

$$\lambda_3 = \lambda_2 \Delta t / (0.1 \Delta t + 0.9 G(t_2; 5; 0.1) - 0.9 G(t_1; 5; 0.1)) \cong 7.9169 \lambda_2.$$

For this example, the average shock rate is  $p = 0.1$  for each move. This corresponds to  $\lambda_2 = 0.1054/s$ , such that  $\lambda_3 = 0.8341$ . Together with an expected pellet withdrawal time of 1.25 s, corresponding to  $\lambda_1 = 0.8$ , and  $G = 1$ ,  $L = 2$ , these parameters were used for the illustrations in figure 1/2, and result in an optimal approach latency of 1.01 s.

### 1.2. Impact of metabolic cost in scenario 1

This is equivalent to scenario 1 with one additional assumption: There is a biological cost of moving which explicitly depends only on  $t_1$ .

This could arise, for example, because moving early when a food pellet appears requires the animal to be in state of higher arousal and has metabolic cost. In this scenario:

$$Z = E(G) + E(L) + C(t_1).$$

Analogous to scenario 2, there exists a non-zero maximiser  $t_1^*$  for  $Z$  if  $C(t_1)$  fulfills the conditions specified for  $E(L)$  in scenario 2.

### 1.3. Impact of parameter changes in scenario 1 with metabolic cost

If a non-zero maximiser  $t_1^*$  exists, we must have

$$\frac{\partial}{\partial t_1} Z = \frac{\partial}{\partial t_1} E(G) + \frac{\partial}{\partial t_1} C(t_1^*) = 0.$$

Analogous to the argument made for scenario 2, we have

$$t'_1 - t^*_1 = - \frac{\frac{\partial}{\partial t_1} C(t_1^*) + G \frac{\partial}{\partial t_1} P_G(t_1^*)}{\frac{\partial^2}{\partial t_1^2} C(t_1^*) + G \frac{\partial^2}{\partial t_1^2} P_G(t_1^*)}.$$

This demonstrates that  $t'_1 - t^*_1$  is sensitive to changes in  $G$  but not to changes in  $L$  or  $E(L)$ .

## 2. Supplemental results

**Table S2 (next page):** Results from a  $3 \times 5$  or  $2 \times 4$  Linear Mixed Effects Model on choice, approach latency, return latency, and correctness of response. No exact p-values can be computed for choice data (see methods). In experiment 4, the time point of leaving the safe place was chosen to compute approach latency. See table S2 for the initiation of movement which shows the same pattern.

|                                        | Choice   |           |       | Approach latency |           |          | Return latency |           |          | Correctness of response |           |          |
|----------------------------------------|----------|-----------|-------|------------------|-----------|----------|----------------|-----------|----------|-------------------------|-----------|----------|
|                                        | <i>F</i> | <i>df</i> |       | <i>F</i>         | <i>df</i> | <i>p</i> | <i>F</i>       | <i>df</i> | <i>p</i> | <i>F</i>                | <i>df</i> | <i>p</i> |
| <b>Experiment 1</b>                    |          |           |       |                  |           |          |                |           |          |                         |           |          |
| <i>Threat level</i>                    | 12.6     | 2, 15923  | 22.4  | 2, 15493         | < 5e-10   | 31.9     | 2, 12788       | < 5e-14   | < 1      | 2, 15734                | n. s.     |          |
| <i>Threat level: linear</i>            |          |           | 21.9  | 1, 15493         | < 5e-6    | 35.1     | 1, 12788       | < 5e-9    |          |                         |           |          |
| <i>Potential loss</i>                  | 785.9    | 5, 15923  | 12.4  | 4, 15493         | < 5e-10   | 14.2     | 4, 12788       | < 5e-11   | < 1      | 4, 15734                | n. s.     |          |
| <i>Potential loss: linear</i>          |          |           | 19.8  | 1, 15493         | < 1e-5    | 22.3     | 1, 12788       | < 5e-6    |          |                         |           |          |
| <i>Threat level × potential loss</i>   | 2.14     | 10, 15923 | < 1   | 8, 15493         | n. s.     | < 1      | 8, 12788       | n. s.     | 2.1      | 8, 15734                | < .05     |          |
| <i>Interaction: linear × linear</i>    |          |           | < 1   | 1, 15493         | n. s.     | < 1      | 1, 12788       | n. s.     |          |                         |           |          |
| <b>Control experiment 2</b>            |          |           |       |                  |           |          |                |           |          |                         |           |          |
| <i>Threat level</i>                    | 4.1      | 2, 13228  | 81.7  | 2, 11808         | < 1e-35   | 25.3     | 2, 9910        | < 1e-10   | 3.6      | 2, 11905                | < .05     |          |
| <i>Threat level: linear</i>            |          |           | 38.9  | 1, 11808         | < 5e-10   | 2.2      | 1, 9910        | n. s.     |          |                         |           |          |
| <i>Potential loss</i>                  | 571.9    | 5, 13228  | 19.5  | 4, 11808         | < 1e-15   | 5.1      | 4, 9910        | < .001    | 2.4      | 4, 11905                | = .05     |          |
| <i>Potential loss: linear</i>          |          |           | 7.9   | 1, 11808         | < .01     | 7.7      | 1, 9910        | < .01     |          |                         |           |          |
| <i>Threat level × potential loss</i>   | < 1      | 10, 13228 | 4.3   | 8, 11808         | < 1e-4    | 1.1      | 8, 9910        | n. s.     | 1.5      | 8, 11905                | n. s.     |          |
| <i>Interaction: linear × linear</i>    |          |           | 6.1   | 1, 11808         | < .05     | 1.6      | 1, 9910        | n. s.     |          |                         |           |          |
| <b>Experiment 3</b>                    |          |           |       |                  |           |          |                |           |          |                         |           |          |
| <i>Threat level</i>                    | 7.6      | 2, 17001  | 26.4  | 2, 17398         | < 5e-12   | 31.2     | 2, 14317       | < 5e-14   | < 1      | 2, 17505                | n. s.     |          |
| <i>Threat level: linear</i>            |          |           | 21.9  | 1, 17398         | < 5e-6    | 20.4     | 1, 14317       | < 1e-5    |          |                         |           |          |
| <i>Potential loss</i>                  | 781.3    | 5, 17001  | 12.1  | 4, 17398         | < 1e-9    | 9.3      | 4, 14317       | < 5e-7    | 3.2      | 4, 17505                | < .05     |          |
| <i>Potential loss: linear</i>          |          |           | 13.0  | 1, 17398         | < 5e-4    | 9.4      | 1, 14317       | < .005    |          |                         |           |          |
| <i>Threat level × potential loss</i>   | < 1      | 10, 17001 | 2.7   | 8, 17398         | < .01     | < 1      | 8, 14317       | n. s.     | < 1      | 8, 17505                | n. s.     |          |
| <i>Interaction: linear × linear</i>    |          |           | < 1   | 1, 17398         | n. s.     | < 1      | 1, 14317       | n. s.     |          |                         |           |          |
| <b>Experiment 1 and 3 combined</b>     |          |           |       |                  |           |          |                |           |          |                         |           |          |
| <i>Threat level</i>                    | 19.8     | 2, 32923  | 41.9  | 2, 32902         | < 1e-18   | 60.8     | 2, 27116       | < 1e-26   | < 1      | 2, 33250                | n. s.     |          |
| <i>Potential loss</i>                  | 1558.5   | 5, 32923  | 12.2  | 4, 32902         | < 1e-9    | 29.4     | 4, 27116       | < 1e-23   | 1.7      | 4, 33250                | n. s.     |          |
| <i>Experiment</i>                      | < 1      | 1, 32923  | 587.9 | 1, 32902         | < 1e-128  | 59.4     | 1, 27116       | < 1e-13   | 1.1      | 1, 33250                | n. s.     |          |
| <i>Threat level × potential loss</i>   | 2.8      | 10, 32923 | 1.2   | 8, 32902         | n. s.     | < 1      | 8, 27116       | n. s.     | 1.0      | 8, 33250                | n. s.     |          |
| <i>Threat level × experiment</i>       | 2.6      | 2, 32923  | 2.8   | 2, 32902         | = .06     | 2.2      | 2, 27116       | n. s.     | < 1      | 2, 33250                | n. s.     |          |
| <i>potential loss × experiment</i>     | 7.8      | 5, 32923  | 7.1   | 4, 32902         | < 1e-4    | 1.2      | 4, 27116       | n. s.     | 2.0      | 4, 33250                | = .09     |          |
| <i>Threat level × token no. × exp.</i> | < 1      | 10, 32923 | 2.1   | 8, 32902         | < .05     | < 1      | 8, 27116       | n. s.     | 1.4      | 8, 33250                | n. s.     |          |
| <b>Experiment 4</b>                    |          |           |       |                  |           |          |                |           |          |                         |           |          |
| <i>Threat level</i>                    | 3.4      | 2, 14885  | 16.5  | 2, 14631         | < 1e-7    | 29.5     | 2, 11734       | < 1e-12   | < 1      | 2, 14715                | n. s.     |          |
| <i>Threat level: linear</i>            |          |           | 13.2  | 1, 14631         | < 5e-4    | 34.5     | 1, 11734       | < 5e-9    |          |                         |           |          |
| <i>Potential loss</i>                  | 685.1    | 5, 14885  | 3.0   | 4, 14631         | < .05     | 78.3     | 4, 11734       | < 1e-64   | < 1      | 4, 14715                | n. s.     |          |
| <i>Potential loss: linear</i>          |          |           | 3.7   | 1, 14631         | = .05     | 63.2     | 1, 11734       | < 5e-15   |          |                         |           |          |
| <i>Threat level × potential loss</i>   | 1.3      | 10, 14885 | 2.1   | 8, 14631         | < .05     | < 1      | 8, 11734       | n. s.     | < 1      | 8, 14715                | n. s.     |          |
| <i>Interaction: linear × linear</i>    |          |           | < 1   | 1, 14631         | n. s.     | < 1      | 1, 11734       | n. s.     |          |                         |           |          |

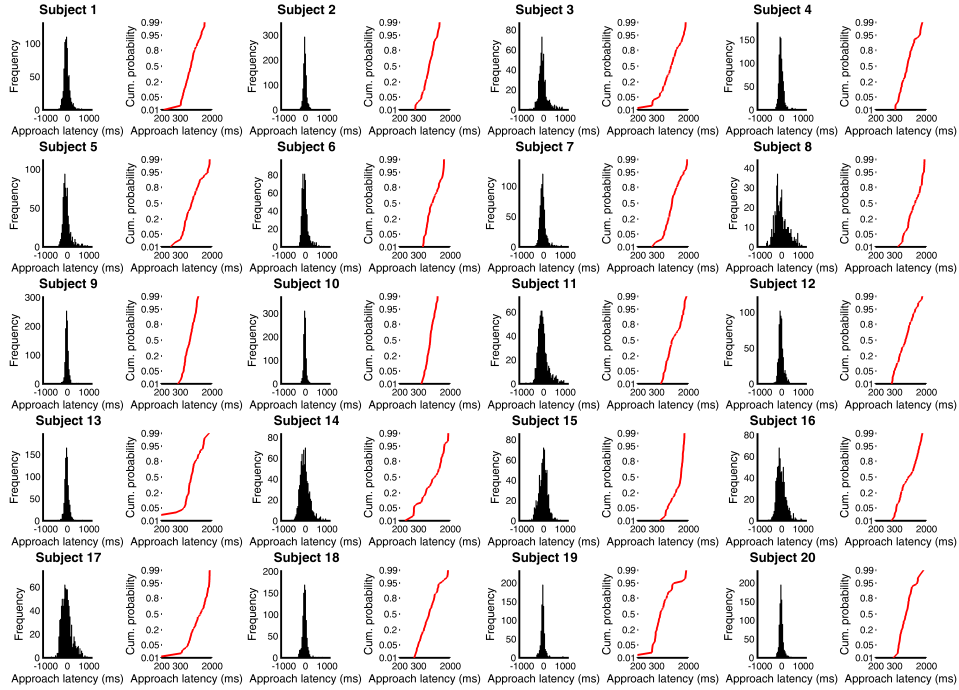

Fig. S1: Approach latency distributions for experiment 1. For each participant, the left plot shows the distribution of deviations from the condition mean which is, for most participants, rather peaked. Decision processes in the absence of sensory evidence accumulation are often assumed to result in a drift to threshold with rate that is constant within one trial and normally distributed across trial, reflected in a recinormal reaction time distributions (LATER model, Carpenter & Williams 1995). The right plot for each participants shows a reciprobbit plot for approach latencies from the first condition (1st token, low threat). This is clearly non-linear for almost all participants, in particular also for those with heavy-tailed approach latency distributions. Thus there is no evidence that the distribution of approach latencies is due to an underlying evidence accumulation process.

**Table S3 (next page):** Results from a  $2 \times 4$  Linear Mixed Effects Models on maximum joystick excursion in NoGo trials (i. e. subthreshold responses), motor initiation latency and response duration until leaving the safe place in Go trials, and estimated phasic sympathetic arousal, for experiment 4. Estimated sympathetic arousal was larger for NoGo trials and for higher potential loss, and the latter effect was more pronounced on NoGo trials. See Fig. S2 for reconstruction of the other measures.

|                                   | Maximum joystick excursion (NoGo) |         |         | Motor initiation latency (Go) |          |         | Response duration (Go) |          |        |
|-----------------------------------|-----------------------------------|---------|---------|-------------------------------|----------|---------|------------------------|----------|--------|
|                                   | F                                 | df      | p       | F                             | df       | p       | F                      | df       | p      |
| <b>Experiment 4</b>               |                                   |         |         |                               |          |         |                        |          |        |
| Threat level                      | 8.7                               | 2, 7393 | < .001  | 28.3                          | 2, 14553 | < 1e-12 | < 1                    | 2, 14553 | n. s.  |
| Threat level: linear              | 15.7                              | 1, 7393 | < 1e-4  | 16.3                          | 1, 14553 | < 1e-4  | < 1                    | 1, 14553 | n. s.  |
| Potential loss                    | 27.2                              | 4, 7393 | < 1e-21 | 12.6                          | 4, 14553 | < 1e-9  | 5.3                    | 4, 14553 | < .001 |
| Potential loss: linear            | 62.1                              | 1, 7393 | < 1e-14 | 8.7                           | 1, 14553 | < 5e-3  | 2.1                    | 1, 14553 | n. s.  |
| Threat level × potential loss     | < 1                               | 8, 7393 | n. s.   | 2.8                           | 8, 14553 | < .01   | 1.2                    | 8, 14553 | n. s.  |
| Interaction: linear × linear      | 1.8                               | 1, 7393 | n. s.   | < 1                           | 1, 14553 | n. s.   | < 1                    | 1, 14553 | n. s.  |
| <b>Phasic sympathetic arousal</b> |                                   |         |         |                               |          |         |                        |          |        |
|                                   | F                                 | df      | p       |                               |          |         |                        |          |        |
| <b>Experiment 4</b>               |                                   |         |         |                               |          |         |                        |          |        |
| Go/NoGo                           | 102.3                             | 1, 568  | <1e-21  |                               |          |         |                        |          |        |
| Threat level                      | < 1                               | 2, 568  | n. s.   |                               |          |         |                        |          |        |
| Potential loss                    | 5.6                               | 5, 568  | <1e-4   |                               |          |         |                        |          |        |
| Threat level × potential loss     | < 1                               | 10, 568 | n. s.   |                               |          |         |                        |          |        |
| Go × threat                       | < 1                               | 2, 568  | n. s.   |                               |          |         |                        |          |        |
| Go × token                        | 2.4                               | 5, 568  | < .01   |                               |          |         |                        |          |        |
| Go × threat × token               | 2.4                               | 10, 568 | < .01   |                               |          |         |                        |          |        |

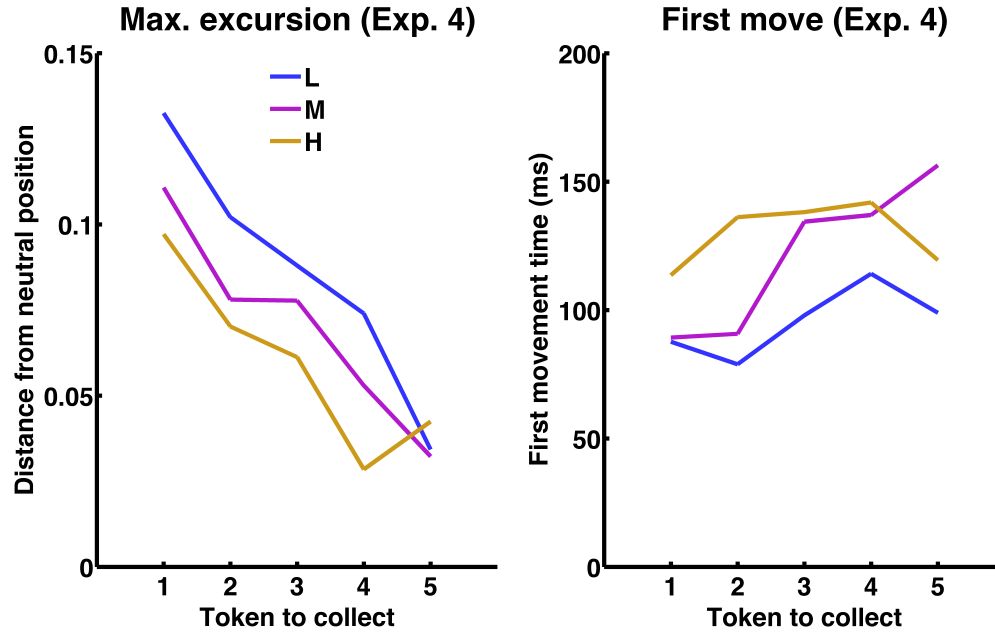

Fig. S2: Experiment 4. Left: Maximum joystick excursion on NoGo trials. Right: Latency (in ms) of motor initiation. The plots show reconstructed cell means, accounting for unequal distribution of data points.

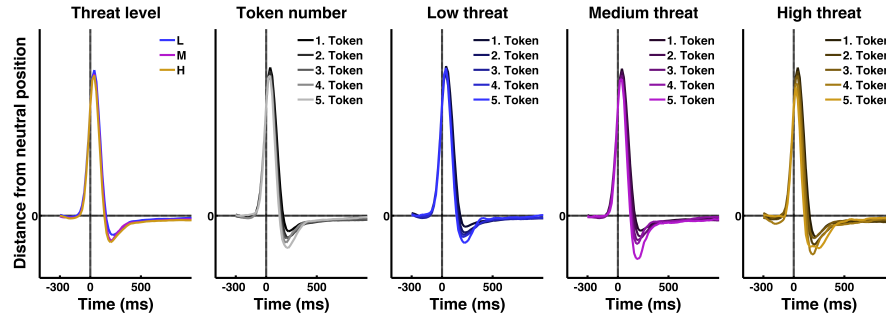

Fig. S3: Experiment 4. Absolute joystick movement (signed vector modulus towards or away from token), centred on the time point when the player left the safe place.
